# Supplementary material
Source: Springer Nature journal article supplement (https://www.springermedizin.de/resource/supplementary/12936_2009_930_MOESM6_ESM.pdf/9548560)

M 1 2 3 4 5 6 7 8 9 10 11 12 13 14 15 16 M

*Pv*

*Pf*

*Pv*

*Pf*

A

B

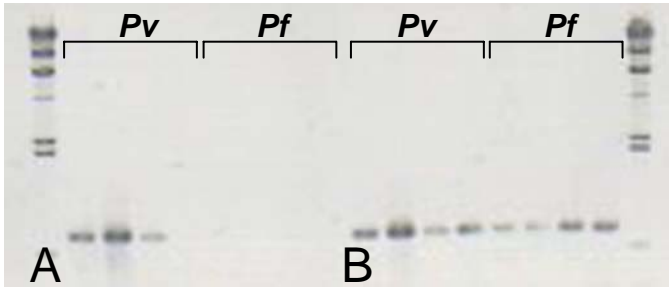

Supplement: MOESM6 [file 9548560]
